# Supplementary material
Source: publisher figshare collection journal article supplement (https://diabetesjournals.figshare.com/articles/dataset/_/14664576)
Supplement: Supplementary file 1 [file 3]

## **Contributions of PECARN Committees and Individuals to the Study**

Participating co-investigators of the PECARN DKA FLUID Study Group at the time of the design and initiation of the study include the following:

UC Davis Health, University of California Davis:

Nathan Kuppermann, MD, MPH

Nicole S. Glaser, MD

Simona Ghetti, PhD

Leah Tzimenatos, MD

Clinton S. Perry III, PhD

James P. Marcin, MD, MPH

Primary Children's Medical Center, University of Utah:

Jeff E. Schunk, MD

Mary Murray, MD

Jared Henricksen, MD

Brad Poss, MD

Cody S. Olsen, MS

T. Charles Casper, PhD

J. Michael Dean, MD, MBA

Nationwide Children's Hospital, Ohio State University:

Michael J. Stoner, MD

Bema Bonsu, MD

Tensing Maa, MD

Justin Indyk, MD, PhD

Children's Hospital Colorado, University of Colorado:

Arleta Rewers, MD, PhD

Marian Rewers, MD, PhD

Peter Mourani, MD

Lalit Bajaj, MD

Texas Children's Hospital, Baylor College of Medicine

Julie K. McManemy, MD, MPH

Jake A. Kushner, MD

Laura L. Loftis, MD

Children's Hospital of Philadelphia, University of Pennsylvania

Sage R. Myers, MD, MSCE

Monika Goyal, MD, MSCE

Rakesh Mistry, MD, MS

Vijay Srinivasan, MD

Andrew Palladino, MD

Colin Hawkes, MD

Boston Children's Hospital, Harvard University

Lise E. Nigrovic, MD, MPH

Joseph I. Wolfsdorf, MD

Michael S. Agus, MD

Rhode Island Hospital, Brown University

Aris Garro, MD, MPH

Linda Snelling, MD

Charlotte Boney, MD, MS (University of Massachusetts Medical School, Baystate)

Children's National Medical Center, George Washington University

Kathleen M. Brown, MD

Fran R. Cogen, MD, CDE

Sonali Basu, MD

St. Louis Children's Hospital, Washington University in St. Louis

Kimberly S. Quayle, MD

Neil H. White, MD, CDE

Nikoleta S. Kolovos, MD

Ann and Robert H. Lurie Children's Hospital of Chicago, Northwestern University

Jennifer L. Trainor, MD

Donald Zimmerman, MD

Denise Goodman, MD, MS

A.I. DuPont Hospital for Children, Thomas Jefferson University

Andrew D. DePiero, MD

Jonathan E. Bennett, MD

Daniel A. Doyle, MD

Meg A. Frizzola, MD

New York Presbyterian Morgan Stanley Children's Hospital, Columbia University

Maria Y. Kwok, MD, MPH

Scott Baird, MD

David Schnadower, MD
