# Supplementary material
Source: publisher figshare collection journal article supplement (https://diabetesjournals.figshare.com/articles/dataset/_/14664576)
Supplement: Supplementary file 2 [file 3]

**Supplemental Table 1. Fluid rehydration protocols**

|                                                       |                                                                                                                 |                                                                           |
|-------------------------------------------------------|-----------------------------------------------------------------------------------------------------------------|---------------------------------------------------------------------------|
| <b>Fluid used for deficit replacement</b>             | <b>Fast</b><br><b>0.45% saline (N=170)</b><br><b>0.90% saline (N=186)</b>                                       | <b>Slow</b><br><b>0.45% saline (N=182)</b><br><b>0.90% saline (N=176)</b> |
| <b>Number of 10 cc/kg fluid boluses (0.9% saline)</b> | 2                                                                                                               | 1                                                                         |
| <b>Assumed fluid deficit</b>                          | 10% of body weight                                                                                              | 5% of body weight                                                         |
| <b>Replacement of deficit</b>                         | half of fluid deficit over initial 12 hours, remaining deficit over subsequent 24 hours<br>+ maintenance fluids | deficit + maintenance over 48 hours                                       |
